# Supplementary material for: Exploring the Epidemiology of Cancer after Solid Organ Transplantation (EpCOT): an observational cohort study
Source: HighWire-hosted journal article supplement (doi:10.1136/bmjopen-2020-043731), 2021-04-01
Supplement: bmjopen-2020-043731supp003_data_supplement.pdf [file bmjopen-2020-043731supp003_data_supplement.pdf]

**HOSPITAL EPISODE STATISTICS DATA****Hospital Episode Statistics Admitted Patient Care****Period**

1997/98  
1998/99  
1999/00  
2000/01  
2001/02  
2002/03  
2003/04  
2004/05  
2005/06  
2006/07  
2007/08  
2008/09  
2009/10  
2010/11  
2011/12  
2012/13  
2013/14  
2014/15  
2015/16  
2016/17  
2017/18  
2018/19

**Other fields**

[ACTIVAGE Age at activity date,  
[ADMIAGE Age on admission,  
[ADMIDATE Date of admission,  
[ADMIFLAG Admission episode flag,  
[ADMIMETH Method of admission,  
[ADMISORC Source of admission,  
[ADMISTAT Psychiatric history on admission,  
[CLASSPAT Patient classification,  
[DIAG\_3\_NN Diagnosis - 3 characters,  
[Diag\_4\_01 Primary Diagnosis - 4 characters,  
[DIAG\_4\_NN Diagnosis - 4 characters,  
[DIAG\_NN All Diagnosis codes,  
[DISDATE Date of discharge,  
[DISDEST Destination on discharge,  
[DISFLAG Discharge episode flag,  
[DISMETH Method of discharge,  
[DISREADYDATE Discharge ready date,  
[DOMPROC Trust derived dominant procedure,  
[ENCRYPTED\_HESID Encrypted HESID,

[EPIEND Date episode ended,  
[EPIORDER Episode order,  
[EPISTART Date episode started,  
[EPISTAT Episode status,  
[EPITYPE Episode type,  
[ETHNOS Ethnic category,  
[FAE Finished Admission Episode,  
[FCEFLAG Finished consultant episode flag,  
[HRGNHSVN Version No. of Trust derived HRG,  
[IMD04 IMD Index of Multiple Deprivation,  
[IMD04\_DECILE IMD Decile Group,  
[IMD04C IMD Crime Domain,  
[IMD04ED IMD Education Training and Skills Domain,  
[IMD04EM IMD Employment Deprivation Domain,  
[IMD04HD IMD Health and Disability Domain,  
[IMD04HS IMD Barriers to Housing and Service Domain,  
[IMD04I IMD Income Domain,  
[IMD04IA IMD Income affecting Adults Domain,  
[IMD04IC IMD Income affecting Children Domain,  
[IMD04LE IMD Living Environment Domain,  
[IMD04RK IMD Overall Rank,  
[LSOA01 Lower Super Output Area (LSOA01),  
[LSOA11 Lower Super Output Area (LSOA11),  
[MAINSPEF Main specialty,  
[OPDATE\_NN Date of operation,  
[OPERSTAT Operation status code,  
[OPERTN\_4\_01 Primary Operative procedure codes 4 character,  
[OPERTN\_4\_NN All secondary Operative procedure codes 4 character,  
[PCON\_ONS Westminster parliamentary constituency (ONS),  
[PROCEDURE3 Provider code - 3 character,  
[PROCEDURE5 Provider code - 5 character,  
[PROCEDURET Provider code,  
[PROVSPNOPS Pseudonymised hospital provider spell number,  
[RESGOR Government office region of residence,  
[SEX Sex of patient,  
[SITETRET Site code of treatment,  
[STARTAGE Age at start of episode,  
[SUSHRG SUS generated HRG,  
[SUSHRGVERS SUS generated HRG version number,  
[TRETSPPEF Treatment specialty

### **Hospital Episode Statistics Outpatients**

#### **Periods**

2003/04

2004/05

2005/06

2006/07

2007/08  
2008/09  
2009/10  
2010/11  
2011/12  
2012/13  
2013/14  
2014/15  
2015/16  
2016/17  
2017/18  
2018/19

**Other fields**

[APPTDATE Appointment date,  
[ATTENDED Attended or did not attend,  
[ATTENDID Attendance identifier,  
[CHAPTER Primary diagnosis chapter,  
[DIAG\_3\_01 Primary diagnosis - 3 character,  
[DIAG\_3\_NN Secondary diagnoses - 3 character,  
[DIAG\_4\_01 Primary diagnosis - 4 character,  
[DIAG\_4\_CONCAT 4 character concatenated diagnosis,  
[DIAG\_4\_NN Secondary diagnoses - 4 character,  
[DIAG\_COUNT Count of diagnoses,  
[DIAG\_NN Diagnosis,  
[DNADATE Last DNA or patient cancelled date,  
[ENCRYPTED\_HESID Encrypted HESID,  
[ETHNOS Ethnic category,  
[HRGNHS Trust derived HRG value,  
[HRGNHVS Version No. of Trust derived HRG,  
[IMD04 IMD Index of Multiple Deprivation,  
[MAINSPEF Main specialty,  
[MYDOB Date of Birth - month and year,  
[NODIAGS Number of Diagnosis,  
[OPERTN\_4\_NN All Operative procedure codes,  
[OPERTN\_NN Operative procedure,  
[PROCEDURE3 Provider code (3 character),  
[PROCEDURE5 Provider code (5 character),  
[SEX Sex of patient,  
[STAFFTYP Medical staff type seeing patient,  
[SUSHRG SUS generated HRG,  
[SUSHRGVERS SUS generated HRG version number,  
[TREATSPEF Treatment specialty,  
[WAITING Days waiting

**Civil Registration (Deaths) - Secondary Care Cut Periods**

**Future 31/12/2016**

Sensitive fields

[cause\_of\_death] Original Underlying Cause of Death,

[cause\_of\_death\_non\_neonatal] Non-neonatal cause of death,

[death\_record\_used] Death Record Used,

[dod] Date of Death,

[subsequent\_activity] Subsequent activity
